# Supplementary material for: Ultracentrifugation-based multi-target affinity selection mass spectrometry
Source: Royal Society of Chemistry journal article supplement (doi:10.1039/c5ra22983a), 2015-01-01
Supplement: c5ra22983a1.pdf [file c5ra22983a1.pdf]

## Supplementary Data

### **Ultracentrifugation-based multi-target affinity selection mass spectrometry**

Yan Jin<sup>1</sup>, Xueheng Cheng<sup>2</sup>, Fengzhi Yang<sup>1</sup>, Lei Fu<sup>1\*</sup>

School of Pharmacy, Shanghai Jiao Tong University, No.800 Dongchuan Rd., Shanghai  
200240, PR China

\* Corresponding author.

*E-mail address:* [leifu@sjtu.edu.cn](mailto:leifu@sjtu.edu.cn) (L. Fu)

<sup>1</sup> School of Pharmacy, Shanghai JiaoTong University, No.800 Dongchuan Rd., Shanghai  
200240, PR China

Tel./Fax: +86 21 3420 4791

<sup>2</sup> DMPK & Bioanalysis, Viva Biotech Ltd., 334 Aidisheng Rd., Shanghai 201203, China

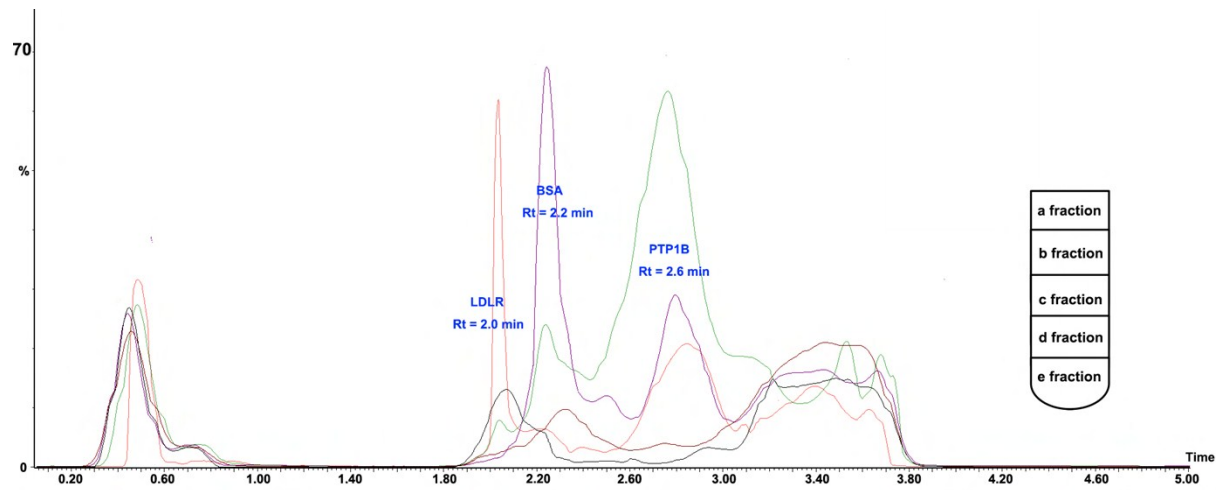

**Fig. S1** LC traces of the mixed proteins including LDLR, BSA and PTP1B in the *a* fraction (black line), *b* fraction (red line), *c* fraction (green line), *d* fraction (purple line) and *e* fraction (hazel line) of the tube after 80 min of rate-zonal density gradient centrifugation

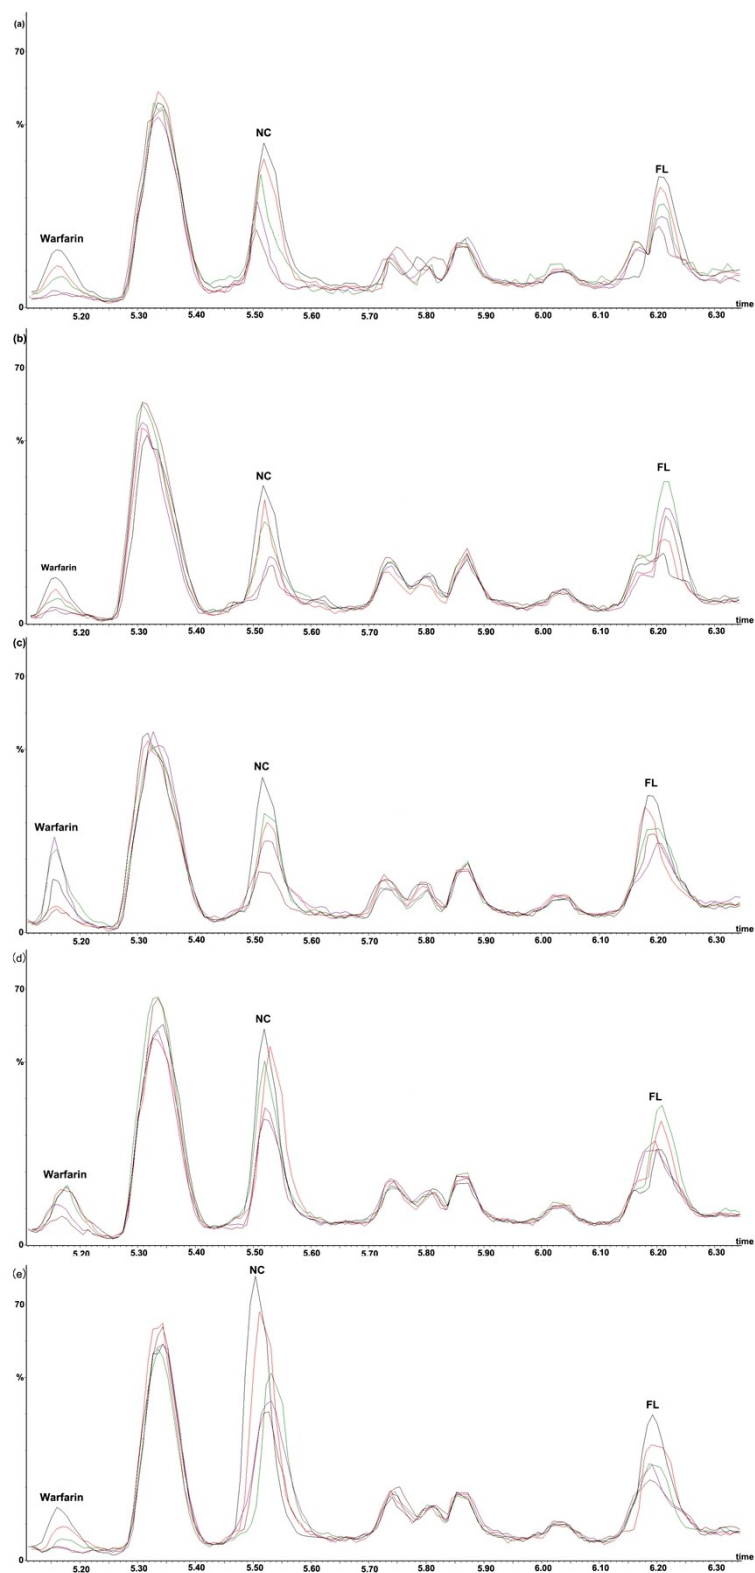

**Fig. S2** LC traces of the mixed standard compounds including warfarin, FL and NC, which were treated with (a) LDLR, (b) PTP1B, (c) BSA, (d) the mixture of LDLR, PTP1B and BSA, (e) WOP, in the parallel *a* fractions (black lines), *b* fractions (red lines), *c* fractions (green lines), *d* fractions (purple lines) and *e* fractions (hazel lines) after 80 min of centrifugation. WOP: without protein.
